# Supplementary material for: Response of peripheral arterial pulse wave velocity to acute exercise in patients after recent myocardial infarction and healthy controls
Source: PLoS One. 2019 Jul 9;14(7):e0219146. doi: 10.1371/journal.pone.0219146 (PMC6615613; doi:10.1371/journal.pone.0219146)
Supplement: S1 File — (XLSX) [file pone.0219146.s001.xlsx]

## Sheet: PE_ab 5min plus baseline
Study.ID	group	age [yrs]	time (min post exercise)	pPWV [m/s]	HR [bpm]	Bpsys [mmHg]	Bpdia [mmHg]	Bpmean [mmHg]	PP [mmHg]	HEIGHT [cm]	WEIGHT [kg]	BMI [kg/m2]	cPWV [m/s]	peak VO2 [ml/kg/min]
21	CAD	44	-30	10.6	49	111.84	60.3334	78.8628	51.5064	186	81	24.72	9.1	42.8
22	CAD	50	-30	9.6	62	111.985	73.0571	87.0388	38.9279	183	84	25.08	11.5	32.0893
23	CAD	50	-30	10.53	66	122.209	80.5795	96.7416	41.6292	185	102	29.8	10.7	24.7067
25	CAD	49	-30	8.08	51	107.542	68.4628	86.8315	39.0797	173	80	26.73	7.9	35.4449
26	CAD	47	-30	9.27	63	107.122	69.8184	84.5862	37.3039	182	85	25.66	9.3	31.4445
30	CAD	49	-30	9.15	48	99.8991	68.1301	82.8194	31.769	184	75	22.15	11.3	34.5843
31	CAD	62	-30	8.63	51	136.322	87.0646	105.182	49.2571	180	115	35.49	10.4	27.0208
32	CAD	53	-30	8.03	67	102.977	71.2458	84.1115	31.7315	168	60	21.26	11	23.9514
34	CAD	65	-30	10.56	65	112.898	72.2039	88.7047	40.6944	170	86	29.76	8.8	30.1262
37	CAD	55	-30	8.44	63	112.661	68.4794	86.7221	44.1817	176	90	29.05	10.5	28.4265
41	CAD	54	-30	11.92	49	107.35	71.3513	86.8373	35.9989	174	81	26.75	8.1	30.3587
49	CAD	59	-30	7.61	60	109.013	78.1898	90.8413	30.8231	178	84	26.51	9.7	37.4722
50	CAD	56	-30	9.45	57	110.846	80.8429	92.7689	30.0028	167	78	27.97	9.8	19.2291
51	CAD	68	-30	11.1	52	109.393	69.1594	85.0197	40.234	182	91	27.47	12.5	27.8461
40	CAD	68	-30	10.5024	56	100.179	70.7426	82.1416	29.4366	165	78	28.65	9	26.5
28	CAD	59	-30	9.27694	51	129.563	84.0695	102.193	45.4935	171	68.8	23.53	10.8	27.2885
54	CAD	52	-30	7.59124	77	110.177	74.8454	89.7367	35.3314	184	97.8	28.9	9.5	26.5
53	CAD	63	-30	11.0247	68	96	60	NA	36	155	46.6	19.4	11.3	25.3
901	healthy old	54	-30	9.12	57	122.728	83.0273	98.0106	39.7009	188	76	21.5	10.4	44.5
902	healthy old	55	-30	7.86	62	105.288	65.5874	79.7053	39.701	172	74.2	25.08	10.6	52.6
904	healthy old	52	-30	10.63	46	131.279	76.4489	99.6134	54.8298	180	80	24.69	8.2	47.2
905	healthy old	51	-30	9.86	48	119	85	NA	34	175	79	25.8	9.7	37.9
906	healthy old	41	-30	10.38	61	132.17	87.3601	107.7	44.8096	174	73.8	24.4	11.4	39.7
907	healthy old	66	-30	11.59	61	118.438	82.6768	97.9864	35.7614	174	67	22.13	11.1	39.8
908	healthy old	53	-30	8.92	73	122	81	NA	41	180	76	23.46	9.3	43.5
909	healthy old	74	-30	9.61	61	115	85	NA	30	172	63	21.3	13.9	29.7
910	healthy old	64	-30	8.89	63	110.764	70.3842	84.5608	40.38	192	80	21.7	12.1	36.7
911	healthy old	49	-30	9.56175	62	122.145	79.4483	94.9563	42.6967	182	84.5	25.5	7.1	47.1
921	healthy young	23	-30	9.10569	60	121.075	75.548	92.309	45.5269	180	77	23.77	8.8	48.3
922	healthy young	21	-30	9.49721	61	120	80	NA	40	176	65	20.98	6.8	47.6
923	healthy young	23	-30	9.2381	46	147.122	78.1826	101.28	68.9397	190	102	28.25	8.7	40.4
924	healthy young	24	-30	7.85714	63	110.556	71.3399	87.1614	39.2157	177	67	21.39	8.9	72.3
925	healthy young	22	-30	7.06334	55	127.846	78.2121	96.2439	49.6342	193	98	26.31	8	46.8
926	healthy young	24	-30	8.72181	66	125.481	78.3337	95.6607	47.1471	181	92	28.08	9	50.5
927	healthy young	27	-30	9.24675	51	105.336	66.9529	79.9662	38.3835	187	87	24.88	7.5	57.1
928	healthy young	31	-30	8.73275	51	132.847	66.8202	91.697	66.0267	180	72	22.22	8.6	74.1
929	healthy young	27	-30	8.71795	50	114.017	72.5712	88.5025	41.4459	176	68	21.95	8.3	49.6
930	healthy young	27	-30	12.6095	55	120.103	77.8122	93.4081	42.291	185	82	23.96	8.8	53.9
21	CAD	44	5	10.685	87.2915	135.361	75.223	99.223	60.138
22	CAD	50	5	8.755	83.466	124.674	87.87	100.65	36.804
23	CAD	50	5	9.54	78.427	NA	NA	NA	NA
25	CAD	49	5	8.605	99.75	131.12	76.582	93.2975	54.538
26	CAD	47	5	8.505	99.386	NA	NA	NA	NA
30	CAD	49	5	9.845	NA	NA	NA	NA	NA
31	CAD	62	5	9.22	80.8015	151.91	92.086	116.367	59.824
32	CAD	53	5	7.31	68.061	103.216	69.285	82.7405	33.9315
34	CAD	65	5	NA	61.167	133.353	76.387	100.905	56.966
37	CAD	55	5	NA	78.3105	125.573	79.6025	97.1685	45.97
41	CAD	54	5	11.02	70.4465	121.353	79.507	95.3815	41.8455
49	CAD	59	5	8.49	87.2475	126.372	79.381	99.25	46.991
50	CAD	56	5	NA	89.597	NA	NA	NA	NA
51	CAD	68	5	12.145	NA	NA	NA	NA	NA
40	CAD	68	5	NA	90.695	NA	NA	NA	NA
28	CAD	59	5	8.725	53.649	NA	NA	NA	NA
54	CAD	52	5	8.05	82.096	NA	NA	NA	NA
53	CAD	63	5	10.65	88.1165	NA	NA	NA	NA
901	healthy old	54	5	9.14	NA	NA	NA	NA	NA
902	healthy old	55	5	NA	88.6945	130.8	84.322	102.606	46.478
904	healthy old	52	5	11.87	82.3	152.812	89.6525	115.162	63.16
905	healthy old	51	5	9.02	80.25	126.321	79.955	98.401	46.366
906	healthy old	41	5	9.27	NA	NA	NA	NA	NA
907	healthy old	66	5	10.365	98.6015	136.744	80.812	102.196	55.9315
908	healthy old	53	5	NA	NA	NA	NA	NA	NA
909	healthy old	74	5	11.11	NA	NA	NA	NA	NA
910	healthy old	64	5	10.115	82.075	NA	NA	NA	NA
911	healthy old	49	5	8.265	103.121	140.087	81.4075	99.9285	58.6795
921	healthy young	23	5	8.9544	NA	NA	NA	NA	NA
922	healthy young	21	5	7.44	118.251	132.625	65.559	89.528	67.0665
923	healthy young	23	5	7.955	93.798	148.306	80.3145	104.159	67.9915
924	healthy young	24	5	6.01	107.769	154.415	86.583	108.702	67.832
925	healthy young	22	5	8.15	103.318	131.376	73.5045	92.2135	57.8715
926	healthy young	24	5	7.855	100.073	NA	NA	NA	NA
927	healthy young	27	5	7.75	80.3305	122.889	65.7795	86.8625	57.1095
928	healthy young	31	5	7.92	97.5245	145.881	74.3655	98.194	71.515
929	healthy young	27	5	7.56	99.7445	NA	NA	NA	NA
930	healthy young	27	5	11.16	95.681	151.927	81.798	108.39	70.129
21	CAD	44	6	10.425	89.8925	131.344	75.0825	97.698	56.261
22	CAD	50	6	8.735	83.0785	125.212	88.0165	101.445	37.195
23	CAD	50	6	9.57	80.717	146.085	97.762	117.335	48.323
25	CAD	49	6	8.59	100.399	128.439	76.984	91.9155	51.4545
26	CAD	47	6	8.13	98.509	115.737	73.55	89.085	42.187
30	CAD	49	6	10.46	76.956	NA	NA	NA	NA
31	CAD	62	6	9.355	81.37	146.842	91.3405	112.123	55.5015
32	CAD	53	6	7.5	69.135	103.364	69.2285	82.948	34.135
34	CAD	65	6	11.81	62.4375	128.112	76.64	98.8065	51.472
37	CAD	55	6	NA	79.6985	136.226	84.73	104.347	51.4955
41	CAD	54	6	10.85	71.0165	118.556	80.616	94.963	37.9405
49	CAD	59	6	8.255	86.3465	121.69	76.62	95.483	45.07
50	CAD	56	6	NA	85.837	101.988	64.652	79.941	37.336
51	CAD	68	6	11.97	60.06	NA	NA	NA	NA
40	CAD	68	6	NA	88.69	NA	NA	NA	NA
28	CAD	59	6	8.985	55.4455	NA	NA	NA	NA
54	CAD	52	6	7.86	82.0745	107.183	74.2255	88.065	32.957
53	CAD	63	6	10.56	88.7235	103.311	72.5205	85.6255	30.79
901	healthy old	54	6	9.215	NA	NA	NA	NA	NA
902	healthy old	55	6	9.17	90.955	117.739	76.573	93.3585	41.1655
904	healthy old	52	6	11.545	81.3015	152.812	89.6525	115.162	63.16
905	healthy old	51	6	9.08	83.796	126.291	80.253	98.065	46.038
906	healthy old	41	6	9.35	93.186	NA	NA	NA	NA
907	healthy old	66	6	10.29	97.3445	126.453	78.3175	97.018	48.135
908	healthy old	53	6	9.11	NA	NA	NA	NA	NA
909	healthy old	74	6	10.87	NA	NA	NA	NA	NA
910	healthy old	64	6	9.785	82.0395	119.195	83.997	98.293	36.1145
911	healthy old	49	6	7.83	101.265	129.666	75.7365	93.371	53.929
921	healthy young	23	6	8.82	NA	NA	NA	NA	NA
922	healthy young	21	6	6.655	115.638	118.121	56.1465	79.3	61.974
923	healthy young	23	6	7.78	93.4595	148.306	80.3145	104.159	67.9915
924	healthy young	24	6	6.185	109.314	152.381	85.388	107.898	66.9935
925	healthy young	22	6	8.305	101.743	134.564	76.8265	94.1975	57.737
926	healthy young	24	6	7.58	97.6305	NA	NA	NA	NA
927	healthy young	27	6	7.505	79.837	119.212	65.756	85.3785	53.456
928	healthy young	31	6	7.295	96.1465	131.737	67.3995	89.0885	64.3375
929	healthy young	27	6	7.28	101.204	NA	NA	NA	NA
930	healthy young	27	6	10.95	93.1655	144.826	80.4745	103.898	64.351
21	CAD	44	7	9.995	87.5405	128.754	72.4495	94.7175	56.3045
22	CAD	50	7	8.825	83.3745	130.107	91.493	105.499	38.6145
23	CAD	50	7	9.245	78.037	139.265	97.9935	113.254	41.2715
25	CAD	49	7	8.455	84.5805	128.014	72.4885	92.208	55.526
26	CAD	47	7	8.025	96.7125	112.591	73.1205	87.9465	39.47
30	CAD	49	7	10.785	78.219	NA	NA	NA	NA
31	CAD	62	7	9.105	80.826	141.246	87.322	107.117	53.9245
32	CAD	53	7	7.93	72.23	104.204	70.4445	84.817	33.76
34	CAD	65	7	11.41	63.999	123.995	72.946	95.139	51.0485
37	CAD	55	7	8.71	82.678	134.135	82.889	102.768	51.246
41	CAD	54	7	10.73	70.727	117.771	80.554	94.109	37.217
49	CAD	59	7	8.385	84.856	121.399	75.997	94.764	45.402
50	CAD	56	7	8.22	82.835	96.795	62.445	74.814	34.35
51	CAD	68	7	11.66	59.309	146.576	76.228	101.743	70.348
40	CAD	68	7	9.57	86.248	82.507	63.085	69.642	19.422
28	CAD	59	7	9.225	54.003	138.608	96.343	116.823	42.265
54	CAD	52	7	7.66	80.879	102.081	72.33	84.7295	29.7505
53	CAD	63	7	10.675	88.276	103.675	71.82	85.0315	31.855
901	healthy old	54	7	9.33	NA	NA	NA	NA	NA
902	healthy old	55	7	9.07	88.189	112.663	73.572	89.015	39.0915
904	healthy old	52	7	NA	80.174	149.988	89.419	113.829	60.5685
905	healthy old	51	7	8.905	83.7935	125.87	79.6385	98.244	46.231
906	healthy old	41	7	9.05	92.703	138.894	93.073	112.254	45.821
907	healthy old	66	7	10.04	94.654	128.8	80.45	99.6255	48.3505
908	healthy old	53	7	9.07	NA	NA	NA	NA	NA
909	healthy old	74	7	11.065	NA	NA	NA	NA	NA
910	healthy old	64	7	9.75	81.461	115.019	83.0805	96.0075	31.6735
911	healthy old	49	7	8.05	101.944	127.479	75.7615	92.352	51.7175
921	healthy young	23	7	8.5008	NA	NA	NA	NA	NA
922	healthy young	21	7	7.06	118.251	117.747	58.5105	79.7175	59.2365
923	healthy young	23	7	7.445	92.409	154.704	84.9245	107.043	69.7795
924	healthy young	24	7	6.31	106.82	139.202	82.798	101.581	56.4035
925	healthy young	22	7	7.855	99.82	132.279	75.082	92.694	57.197
926	healthy young	24	7	7.52	96.928	NA	NA	NA	NA
927	healthy young	27	7	7.32	79.3935	118.907	66.1365	84.7465	52.7705
928	healthy young	31	7	7.825	95.075	131.879	68.185	88.292	63.694
929	healthy young	27	7	7.32	98.4645	NA	NA	NA	NA
930	healthy young	27	7	10.81	92.676	143.095	79.804	102.08	63.291
21	CAD	44	8	10.045	88.9995	129.485	74.727	97.0975	54.758
22	CAD	50	8	8.85	82.7975	129.57	89.9935	104.781	39.576
23	CAD	50	8	9.53	79.431	139.613	96.6735	112.734	42.939
25	CAD	49	8	8.4	81.596	123.758	71.164	91.826	52.594
26	CAD	47	8	7.7	94.791	112.803	74.147	88.803	38.6565
30	CAD	49	8	10.605	76.233	127.632	85.5985	104.002	42.033
31	CAD	62	8	8.97	81.0355	146.082	91.19	111.624	54.892
32	CAD	53	8	7.79	72.5595	106.18	71.71	87.0165	34.4705
34	CAD	65	8	11.515	64.385	121.21	70.8715	92.7595	50.339
37	CAD	55	8	8.535	80.2835	130.441	81.1815	99.7475	49.26
41	CAD	54	8	10.82	72.128	112.671	79.612	91.2065	33.0595
49	CAD	59	8	NA	83.872	118.856	75.611	93.136	43.2445
50	CAD	56	8	8.785	84.591	98.402	62.7935	76.9675	35.6085
51	CAD	68	8	11.44	60.4025	134.024	75.1105	96.95	58.913
40	CAD	68	8	9.29	85.996	90.8345	65.3835	74.391	25.451
28	CAD	59	8	9.095	54.114	134.514	96.5085	114.021	38.006
54	CAD	52	8	NA	80.4895	101.103	70.308	83.005	30.7945
53	CAD	63	8	10.55	88.5825	108.114	72.1965	87.146	35.917
901	healthy old	54	8	9.08	NA	NA	NA	NA	NA
902	healthy old	55	8	9.06	86.513	124.082	80.0845	98.4125	43.998
904	healthy old	52	8	NA	80.389	150.99	89.274	114.186	61.716
905	healthy old	51	8	8.705	83.0765	124.845	79.35	96.9675	45.495
906	healthy old	41	8	8.7	91.9925	133.714	90.8655	108.57	42.849
907	healthy old	66	8	10.05	96.0745	125.963	79.451	97.828	46.512
908	healthy old	53	8	9.155	NA	NA	NA	NA	NA
909	healthy old	74	8	10.88	NA	NA	NA	NA	NA
910	healthy old	64	8	9.58	81.705	116.889	83.346	96.9535	33.505
911	healthy old	49	8	7.775	100.657	126.431	75.3365	91.7075	51.0945
921	healthy young	23	8	8.5092	NA	NA	NA	NA	NA
922	healthy young	21	8	6.63	112.537	115.879	58.1395	78.918	57.7395
923	healthy young	23	8	7.545	89.148	153.908	81.629	105.578	72.279
924	healthy young	24	8	6.22	103.826	142.18	83.7285	102.757	58.4515
925	healthy young	22	8	7.895	98.8435	132.629	75.7605	94.489	56.8685
926	healthy young	24	8	7.475	95.6935	NA	NA	NA	NA
927	healthy young	27	8	7.26	80.139	120.01	67.7995	87.102	52.211
928	healthy young	31	8	7.8	94.179	131.399	72.544	92.0465	58.855
929	healthy young	27	8	7.235	98.2135	NA	NA	NA	NA
930	healthy young	27	8	10.675	92.609	137.598	83.045	101.772	54.553
21	CAD	44	9	9.81	90.7455	132.623	79.2605	101.376	53.3625
22	CAD	50	9	8.85	83.141	125.482	88.439	101.237	37.043
23	CAD	50	9	9.43	79.783	139.1	95.927	112.103	43.173
25	CAD	49	9	8.295	83.1005	118.106	76.8885	92.775	41.217
26	CAD	47	9	7.755	96.618	110.291	74.158	87.24	36.1335
30	CAD	49	9	10.27	77.4155	129.99	89.172	108.022	40.818
31	CAD	62	9	9.12	80.069	131.555	79.4915	99.2905	52.0635
32	CAD	53	9	8.075	70.1315	103.522	71.5265	85.2905	31.996
34	CAD	65	9	11.755	63.758	121.076	70.1235	92.339	50.9525
37	CAD	55	9	8.605	79.0775	134.792	82.84	103.364	51.9525
41	CAD	54	9	10.745	69.093	114.794	82.095	93.6975	32.699
49	CAD	59	9	7.615	80.817	117.136	72.876	90.871	44.26
50	CAD	56	9	9.04	87.075	99.4195	63.774	77.6285	35.6455
51	CAD	68	9	10.98	59.6325	127.314	74.916	93.78	52.3985
40	CAD	68	9	9.34	85.016	94.828	62.009	74.81	32.819
28	CAD	59	9	9.105	54.576	138.63	93.819	113.689	44.811
54	CAD	52	9	7.695	79.521	101.329	71.2195	83.614	30.11
53	CAD	63	9	10.7	88.8615	103.943	71.572	84.6295	32.371
901	healthy old	54	9	9.42	NA	NA	NA	NA	NA
902	healthy old	55	9	8.685	84.5375	126.144	83.283	99.9145	42.8615
904	healthy old	52	9	10.715	81.0585	147.28	88.635	112.267	58.6445
905	healthy old	51	9	8.77	82.718	126.539	81.858	99.0535	44.681
906	healthy old	41	9	8.89	91.232	133.508	90.568	108.766	42.94
907	healthy old	66	9	10.055	94.1915	123.754	78.268	97.166	45.486
908	healthy old	53	9	9.36	NA	NA	NA	NA	NA
909	healthy old	74	9	11.08	NA	NA	NA	NA	NA
910	healthy old	64	9	9.96	81.315	115.381	83.384	96.4335	32.0185
911	healthy old	49	9	7.735	99.6335	128.993	77.759	94.4945	51.234
921	healthy young	23	9	8.3328	NA	NA	NA	NA	NA
922	healthy young	21	9	6.625	113.618	117.256	56.157	79.087	61.099
923	healthy young	23	9	7.455	90.679	156.786	87.7135	108.569	69.072
924	healthy young	24	9	6.645	105.138	148.53	92.82	111.07	55.7105
925	healthy young	22	9	8.28	100.111	136.192	81.028	97.149	55.164
926	healthy young	24	9	7.39	95.327	NA	NA	NA	NA
927	healthy young	27	9	7.28	80.7335	119.139	70.244	87.695	48.8955
928	healthy young	31	9	7.54	92.809	129.906	71.692	90.8985	58.2145
929	healthy young	27	9	8	101.141	NA	NA	NA	NA
930	healthy young	27	9	10.49	91.0475	138.038	83.5075	102.615	54.531
21	CAD	44	10	9.58	88.753	128.311	75.5455	97.537	52.766
22	CAD	50	10	8.575	80.281	125.625	87.612	101.501	38.013
23	CAD	50	10	9.485	81.1695	141.57	99.402	115.57	42.168
25	CAD	49	10	8.22	82.3235	117.924	74.354	90.7505	43.5705
26	CAD	47	10	7.685	93.546	111.371	75.357	88.708	36.0135
30	CAD	49	10	9.975	77.435	131.874	90.3235	108.32	41.55
31	CAD	62	10	9.71	NA	NA	NA	NA	NA
32	CAD	53	10	7.945	69.579	106.192	74.07	87.961	32.1215
34	CAD	65	10	11.19	66.8015	122.933	70.0115	92.52	52.922
37	CAD	55	10	8.34	81.278	129.519	81.9255	98.4875	47.594
41	CAD	54	10	10.87	71.8955	114.794	90.558	96.488	24.2365
49	CAD	59	10	8.33	80.251	117.719	74.0405	91.7635	43.678
50	CAD	56	10	9.25	78.252	97.605	62.648	77.227	34.957
51	CAD	68	10	11.56	60.2715	123.222	70.254	90.4115	52.9675
40	CAD	68	10	9.065	84.786	94.658	58.569	74.847	36.089
28	CAD	59	10	9.05	53.552	135.424	90.266	110.249	45.158
54	CAD	52	10	7.095	78.8535	102.278	72.9055	84.6885	29.3725
53	CAD	63	10	10.55	88.6865	104.635	71.0665	84.7035	33.5685
901	healthy old	54	10	9.35	NA	NA	NA	NA	NA
902	healthy old	55	10	8.755	82.526	125.933	84.345	101.547	41.588
904	healthy old	52	10	10.46	80.7855	144.122	89.0385	110.746	55.0835
905	healthy old	51	10	8.53	79.6105	122.999	79.424	97.643	43.575
906	healthy old	41	10	NA	92.2485	132.192	90.4125	108.21	41.78
907	healthy old	66	10	9.95	93.503	124.828	80.8945	98.871	43.933
908	healthy old	53	10	9.31	NA	NA	NA	NA	NA
909	healthy old	74	10	10.925	NA	NA	NA	NA	NA
910	healthy old	64	10	11.1	80.5895	117.684	83.3625	97.3395	33.6035
911	healthy old	49	10	7.83	101.433	133.983	77.162	97.339	56.8215
921	healthy young	23	10	8.2992	NA	NA	NA	NA	NA
922	healthy young	21	10	6.52	113.726	117.876	60.698	81.2085	57.1775
923	healthy young	23	10	7.42	91.691	159.163	90.074	110.857	69.0895
924	healthy young	24	10	6.635	103.111	142.8	89.8085	107.332	52.992
925	healthy young	22	10	8.22	97.755	133.564	79.476	96.1325	54.088
926	healthy young	24	10	7.41	92.2305	NA	NA	NA	NA
927	healthy young	27	10	7.305	79.732	120.535	71.1395	89.4855	49.3955
928	healthy young	31	10	7.385	92.025	128.955	73.254	92.001	55.701
929	healthy young	27	10	8.305	101.889	NA	NA	NA	NA
930	healthy young	27	10	10.395	89.7675	138.934	82.8545	103.624	56.0795
21	CAD	44	11	9.33	87.6265	128.573	79.374	99.7225	49.1995
22	CAD	50	11	8.655	78.87	124.049	86.9535	100.659	37.095
23	CAD	50	11	9.535	79.2015	140.506	99.8455	115.427	40.66
25	CAD	49	11	8.185	78.697	113.775	72.495	88.436	41.28
26	CAD	47	11	7.63	97.048	110.917	75.732	88.176	35.185
30	CAD	49	11	9.63	73.9945	126.043	87.442	103.95	38.601
31	CAD	62	11	8.5	NA	NA	NA	NA	NA
32	CAD	53	11	8.1	70.414	106.84	76.987	89.73	29.8525
34	CAD	65	11	10.695	65.0875	121.105	69.661	91.8935	51.4435
37	CAD	55	11	8.455	80.962	125.504	78.132	96.172	47.3725
41	CAD	54	11	10.95	69.257	111.973	84.713	92.363	27.26
49	CAD	59	11	8.035	79.435	119.935	76.742	94.096	43.193
50	CAD	56	11	9.23	79.396	100.895	67.364	81.787	33.531
51	CAD	68	11	10.88	59.494	123.101	71.4285	90.2345	51.6725
40	CAD	68	11	9.14	83.911	101.39	65.705	78.345	35.685
28	CAD	59	11	8.965	52.301	129.693	84.6265	103.918	45.0665
54	CAD	52	11	7.83	78.5305	103.539	73.555	85.6305	29.984
53	CAD	63	11	10.89	89.3925	109.189	74.3215	88.5505	34.868
901	healthy old	54	11	9.49	NA	NA	NA	NA	NA
902	healthy old	55	11	8.73	85.959	123.635	82.7	99.139	40.9345
904	healthy old	52	11	10.575	81.532	145.922	89.476	111.378	56.4455
905	healthy old	51	11	8.365	80.858	124.415	82.111	99.5965	42.3035
906	healthy old	41	11	8.165	89.234	132.722	90.109	109.183	42.613
907	healthy old	66	11	9.77	94.236	126.132	80.6505	99.432	45.482
908	healthy old	53	11	9.265	NA	NA	NA	NA	NA
909	healthy old	74	11	10.875	NA	NA	NA	NA	NA
910	healthy old	64	11	10.99	79.9255	117.598	84.0805	97.9645	32.902
911	healthy old	49	11	8.375	100.391	130.16	81.086	97.881	49.0735
921	healthy young	23	11	8.3076	NA	NA	NA	NA	NA
922	healthy young	21	11	6.56	114.823	121.883	63.5115	84.457	58.372
923	healthy young	23	11	7.675	89.854	159.592	91.074	112.316	68.518
924	healthy young	24	11	6.655	100.559	141.731	88.268	106.692	53.463
925	healthy young	22	11	8.66	98.738	132.503	81.729	94.791	50.774
926	healthy young	24	11	7.37	93.017	NA	NA	NA	NA
927	healthy young	27	11	7.245	79.1155	119.722	71.07	88.192	48.652
928	healthy young	31	11	7.215	91.731	133.548	76.686	96.469	56.862
929	healthy young	27	11	8.415	97.398	NA	NA	NA	NA
930	healthy young	27	11	10.81	89.126	140.385	85.4545	106.153	54.93
21	CAD	44	12	9.255	88.659	129.815	80.8315	101.326	48.9835
22	CAD	50	12	8.68	80.2505	124.29	88.6075	101.569	35.6825
23	CAD	50	12	9.56	78.6905	140.673	98.372	113.9	42.3005
25	CAD	49	12	NA	79.189	117.754	74.0515	90.958	43.7025
26	CAD	47	12	NA	95.238	110.552	73.132	86.432	37.42
30	CAD	49	12	9.275	73.193	118.641	81.821	97.619	36.82
31	CAD	62	12	8.69	NA	NA	NA	NA	NA
32	CAD	53	12	8.345	69.626	108.032	76.237	90.114	31.795
34	CAD	65	12	10.475	64.712	120.885	69.365	91.4795	51.5195
37	CAD	55	12	8.52	79.26	125.368	76.937	93.597	48.431
41	CAD	54	12	11.31	70.861	117.772	86.3315	97.0965	31.441
49	CAD	59	12	7.895	78.32	122.651	76.954	94.941	45.697
50	CAD	56	12	8.965	77.188	102.671	65.889	80.737	36.7815
51	CAD	68	12	11.07	59.7795	122.001	75.2835	91.8095	46.718
40	CAD	68	12	9.21	83.036	107.601	68.826	85.5035	38.775
28	CAD	59	12	9.06	53.286	133.498	86.749	107.146	46.749
54	CAD	52	12	7.97	79.2385	104.806	74.4135	87.0055	30.393
53	CAD	63	12	10.85	90.3335	108.378	75.2655	88.5095	33.1125
901	healthy old	54	12	NA	NA	NA	NA	NA	NA
902	healthy old	55	12	8.69	84.746	122.211	86.481	100.831	35.73
904	healthy old	52	12	10.455	82.338	141.024	89.1565	109.341	51.868
905	healthy old	51	12	8.31	79.8525	124.74	83.109	100.224	41.6315
906	healthy old	41	12	8.24	88.577	134.938	90.71	110.062	44.228
907	healthy old	66	12	9.705	92.2345	125.998	82.2735	100.129	43.724
908	healthy old	53	12	9.45	NA	NA	NA	NA	NA
909	healthy old	74	12	10.7	NA	NA	NA	NA	NA
910	healthy old	64	12	10.715	81.243	115.809	84.696	97.078	30.4585
911	healthy old	49	12	8.215	99.271	130.749	82.54	98.5905	48.2085
921	healthy young	23	12	8.5092	NA	NA	NA	NA	NA
922	healthy young	21	12	6.92	109.957	125.367	68.197	86.992	57.17
923	healthy young	23	12	7.83	88.4875	159.587	90.7555	112.472	68.831
924	healthy young	24	12	6.9	101.174	146.929	94.102	111.855	52.8265
925	healthy young	22	12	8.47	97.5315	128.972	75.8305	92.315	53.1415
926	healthy young	24	12	7.57	91.0685	NA	NA	NA	NA
927	healthy young	27	12	7.525	76.973	120.216	71.9795	88.8445	48.236
928	healthy young	31	12	7.23	90.583	126.745	70.838	88.335	55.907
929	healthy young	27	12	8.445	97.502	NA	NA	NA	NA
930	healthy young	27	12	10.89	87.5645	139.339	90.9225	110.355	48.416
21	CAD	44	13	9.215	86.7055	126.78	78.3955	98.1765	48.3845
22	CAD	50	13	8.64	79.681	126.215	89.586	103.011	36.629
23	CAD	50	13	9.45	77.7705	140.83	100.576	115.401	40.254
25	CAD	49	13	NA	NA	NA	NA	NA	NA
26	CAD	47	13	NA	NA	NA	NA	NA	NA
30	CAD	49	13	9.14	72.8395	128.202	85.5325	104.141	42.67
31	CAD	62	13	8.98	NA	NA	NA	NA	NA
32	CAD	53	13	8.705	68.063	111.665	80.103	93.86	31.5625
34	CAD	65	13	9.83	65.0915	118.518	69.4815	90.4735	49.0365
37	CAD	55	13	8.51	76.5595	122.602	77.317	94.4745	45.2845
41	CAD	54	13	11.04	70.6	118.901	87.8005	98.3735	31.101
49	CAD	59	13	7.81	77.855	123.277	78.609	96.178	44.668
50	CAD	56	13	8.99	78.389	123.692	74.264	92.091	49.428
51	CAD	68	13	11.65	60.4075	122.499	76.076	92.8395	46.4225
40	CAD	68	13	9.085	81.022	102.302	70.2075	80.862	32.095
28	CAD	59	13	9.135	53.5675	134.855	87.5595	106.454	47.2955
54	CAD	52	13	7.89	79.836	107.457	76.8885	89.053	30.568
53	CAD	63	13	10.86	90.339	109.391	72.072	87.7325	37.3185
901	healthy old	54	13	9.19	NA	NA	NA	NA	NA
902	healthy old	55	13	8.84	82.5095	123.685	86.5515	101.781	37.1335
904	healthy old	52	13	10.19	80.285	139.859	88.255	108.216	51.604
905	healthy old	51	13	8.45	77.6435	127.388	83.562	101.812	43.826
906	healthy old	41	13	8.505	90.043	132.102	90.2925	108.322	41.81
907	healthy old	66	13	9.825	92.0865	127.229	82.631	100.731	44.598
908	healthy old	53	13	9.125	NA	NA	NA	NA	NA
909	healthy old	74	13	10.8	NA	NA	NA	NA	NA
910	healthy old	64	13	10.38	81.888	116.442	85.351	98.1955	30.0485
911	healthy old	49	13	8.23	98.698	129.361	83.478	98.531	45.8825
921	healthy young	23	13	8.4588	NA	NA	NA	NA	NA
922	healthy young	21	13	6.995	109.688	124.71	70.566	88.9795	54.144
923	healthy young	23	13	7.8	89.478	163.773	91.5825	114.068	72.19
924	healthy young	24	13	6.66	100.939	142.665	92.54	109.35	50.125
925	healthy young	22	13	8.62	98.039	135.662	81.722	96.382	53.94
926	healthy young	24	13	7.815	91.365	NA	NA	NA	NA
927	healthy young	27	13	7.705	76.8545	118.782	72.4065	89.5705	46.3755
928	healthy young	31	13	7.345	92.1605	128.22	72.055	89.3475	56.1655
929	healthy young	27	13	8.39	96.405	NA	NA	NA	NA
930	healthy young	27	13	10.79	87.368	137.438	91.246	107.263	46.192
21	CAD	44	14	9.19	89.0585	129.786	84.5215	102.796	45.264
22	CAD	50	14	8.6	77.699	125.223	88.675	101.334	36.548
23	CAD	50	14	9.55	75.5315	141.348	100.868	115.856	40.48
25	CAD	49	14	NA	NA	NA	NA	NA	NA
26	CAD	47	14	NA	NA	NA	NA	NA	NA
30	CAD	49	14	9.05	72.72	118.364	82.6465	96.7155	35.7175
31	CAD	62	14	9.14	NA	NA	NA	NA	NA
32	CAD	53	14	8.205	71.017	109.768	77.4875	91.069	32.2805
34	CAD	65	14	10.35	64.695	120.762	70.7825	92.216	49.9795
37	CAD	55	14	8.3	74.199	124.411	82.196	95.278	42.215
41	CAD	54	14	11.03	71.02	115.265	84.8405	94.7025	30.4245
49	CAD	59	14	7.73	74.25	117.459	74.133	91.524	43.326
50	CAD	56	14	8.74	NA	NA	NA	NA	NA
51	CAD	68	14	11.225	61.4285	120.189	75.4295	91.9685	44.7595
40	CAD	68	14	9.135	80.501	106.945	71.288	83.316	35.657
28	CAD	59	14	9.01	51.717	131.082	86.5395	104.808	44.542
54	CAD	52	14	8.05	77.453	105.88	74.513	87.126	31.367
53	CAD	63	14	10.97	92.3225	109.195	72.31	86.875	36.8855
901	healthy old	54	14	NA	NA	NA	NA	NA	NA
902	healthy old	55	14	8.58	82.5095	121.479	85.231	100.724	36.248
904	healthy old	52	14	10.63	80.285	143.406	90.5415	110.727	52.8645
905	healthy old	51	14	8.22	77.1445	127.348	82.0115	99.441	45.3365
906	healthy old	41	14	8.34	88.095	129.031	86.771	105.704	42.26
907	healthy old	66	14	9.855	92.545	126.032	83.5275	100.849	42.505
908	healthy old	53	14	NA	NA	NA	NA	NA	NA
909	healthy old	74	14	10.71	NA	NA	NA	NA	NA
910	healthy old	64	14	NA	81.9255	120.059	86.3935	100.231	33.666
911	healthy old	49	14	8.13	98.146	134.521	82.5095	102.083	52.0115
921	healthy young	23	14	8.316	NA	NA	NA	NA	NA
922	healthy young	21	14	6.37	106.375	123.626	67.043	86.658	56.583
923	healthy young	23	14	7.955	87.324	168.298	92.0835	116.01	76.215
924	healthy young	24	14	7.02	99.2775	143.001	91.353	108.48	51.648
925	healthy young	22	14	8.7	95.8185	136.337	79.407	97.8205	56.9295
926	healthy young	24	14	7.61	89.5665	NA	NA	NA	NA
927	healthy young	27	14	7.775	77.278	118.821	73.268	90.0415	45.553
928	healthy young	31	14	7.59	94.0165	131.675	73.9395	92.1055	57.736
929	healthy young	27	14	8.62	94.8885	NA	NA	NA	NA
930	healthy young	27	14	10.81	87.61	134.348	82.504	100.936	51.844

## Sheet: peak BP
	Study.ID	group	age	time (min post exercise)	PWV	HR	BPsys	BPdia	BPmean	PP
39	21	CAD	44	5	10.685	87.2915	135.361	75.223	99.223	60.138
40	22	CAD	50	5	8.755	83.466	124.674	87.87	100.65	36.804
41	23	CAD	50	5	9.57	80.717	146.085	97.762	117.335	48.323
42	25	CAD	49	5	8.605	99.75	131.12	76.582	93.2975	54.538
43	26	CAD	47	5	8.505	99.386	115.737	73.55	89.085	42.187
44	30	CAD	49	5	9.845	76.233	127.632	85.5985	104.002	42.033
45	31	CAD	62	5	9.22	80.8015	151.91	92.086	116.367	59.824
46	32	CAD	53	5	7.31	68.061	103.216	69.285	82.7405	33.9315
47	34	CAD	65	5		61.167	133.353	76.387	100.905	56.966
48	37	CAD	55	5		78.3105	125.573	79.6025	97.1685	45.97
49	41	CAD	54	5	11.02	70.4465	121.353	79.507	95.3815	41.8455
50	49	CAD	59	5	8.49	87.2475	126.372	79.381	99.25	46.991
51	50	CAD	56	5		89.597	101.988	64.652	79.941	37.336
52	51	CAD	68	5	12.145		146.576	76.228	101.743	70.348
53	40	CAD	68	5		90.695	82.507	63.085	69.642	19.422
54	28	CAD	59	5	8.725	53.649	138.608	96.343	116.823	42.265
55	54	CAD	52	5	8.05	82.096	107.183	74.2255	88.065	32.957
56	53	CAD	63	5	10.65	88.1165	103.311	72.5205	85.6255	30.79
57	901	healthy old	54	5	9.14
58	902	healthy old	55	5		88.6945	130.8	84.322	102.606	46.478
59	904	healthy old	52	5	11.87	82.3	152.812	89.6525	115.162	63.16
60	905	healthy old	51	5	9.02	80.25	126.321	79.955	98.401	46.366
61	906	healthy old	41	5	9.27	92.703	138.894	93.073	112.254	45.821
62	907	healthy old	66	5	10.365	98.6015	136.744	80.812	102.196	55.9315
63	908	healthy old	53	5
64	909	healthy old	74	5	11.11
65	910	healthy old	64	5	10.115	82.075	119.195	83.997	98.293	36.1145
66	911	healthy old	49	5	8.265	103.121	140.087	81.4075	99.9285	58.6795
67	921	healthy young	23	5	8.9544
68	922	healthy young	21	5	7.44	118.251	132.625	65.559	89.528	67.0665
69	923	healthy young	23	5	7.955	93.798	148.306	80.3145	104.159	67.9915
70	924	healthy young	24	5	6.01	107.769	154.415	86.583	108.702	67.832
71	925	healthy young	22	5	8.15	103.318	131.376	73.5045	92.2135	57.8715
72	926	healthy young	24	5	7.855	100.073
73	927	healthy young	27	5	7.75	80.3305	122.889	65.7795	86.8625	57.1095
74	928	healthy young	31	5	7.92	97.5245	145.881	74.3655	98.194	71.515
75	929	healthy young	27	5	7.56	99.7445
76	930	healthy young	27	5	11.16	95.681	151.927	81.798	108.39	70.129
